# Supplementary material for: Survival prediction in gliomas based on MRI radiomics combined with clinical factors and molecular biomarkers
Source: PeerJ. 2025 Aug 20;13:e19906. doi: 10.7717/peerj.19906 (PMC12374691; doi:10.7717/peerj.19906)
Supplement: Supplemental Information 6 [file peerj-13-19906-s006.xlsx]

## Sheet: Sheet1
sex	Encoding label		MGMT Status	Encoding label
male	0		Unmethylation	0
female	1		Methylation	1
Grade	Encoding label		Status	Encoding label
2	II		survival	1
3	III		death	2
4	IV
IDH Status	Encoding label
Wild type	0
Mutation	1
